# Supplementary material
Source: PubMed Central journal article supplement (PMC6134242)
Supplement: jcsm.14.9.1605s1.pdf [file jcsm.14.9.1605s1.pdf]

## Search Strategies

### Pubmed

|                     |                                                                                                                                                                                                                                                                                                                                                                                                                                                                                                                                                                                                                   |
|---------------------|-------------------------------------------------------------------------------------------------------------------------------------------------------------------------------------------------------------------------------------------------------------------------------------------------------------------------------------------------------------------------------------------------------------------------------------------------------------------------------------------------------------------------------------------------------------------------------------------------------------------|
| <i>Disease 1</i>    | "Sleep Apnea Syndromes"[Mesh] OR "sleep apnea" OR "Sleep breathing disorder" OR "Sleep-disordered breathing" OR "Sleep disordered breathing" OR "Obstructive sleep apnea"                                                                                                                                                                                                                                                                                                                                                                                                                                         |
| <i>Disease 2</i>    | "Snoring"[Mesh] OR "snore" OR "snores"                                                                                                                                                                                                                                                                                                                                                                                                                                                                                                                                                                            |
| <i>Intervention</i> | "Mobile Applications"[Mesh] OR "mobile applications" OR "mobile apps" OR "apps" OR "gadgets" OR "health trackers" OR "mhealth" OR "wearable device" OR "iphone" OR "android" OR "fitbit" OR "cell phones" OR "cellular phones" OR "mobile phones" OR "smartphones" OR "mobile" OR tablet OR "Commercial Accelerometer" OR "Commercial Actigraphy" OR "Wrist-Based" OR "Handheld device"                                                                                                                                                                                                                           |
| <i>Comparison</i>   | -                                                                                                                                                                                                                                                                                                                                                                                                                                                                                                                                                                                                                 |
| <i>Outcome</i>      | -                                                                                                                                                                                                                                                                                                                                                                                                                                                                                                                                                                                                                 |
| <i>String</i>       | (Sleep Apnea Syndromes"[Mesh] OR "sleep apnea" OR "Sleep breathing disorder" OR "Sleep-disordered breathing" OR "Sleep disordered breathing" OR "Obstructive sleep apnea" OR "Snoring"[Mesh] OR "snore" OR "snores") AND (Mobile Applications"[Mesh] OR "mobile applications" OR "mobile apps" OR "apps" OR "gadgets" OR "health trackers" OR "mhealth" OR "wearable device" OR "iphone" OR "android" OR "fitbit" OR "cell phones" OR "cellular phones" OR "mobile phones" OR "smartphones" OR "mobile" OR tablet OR "Commercial Accelerometer" OR "Commercial Actigraphy" OR "Wrist-Based" OR "Handheld device") |

### Embase [String]

'mobile application'/exp OR 'mobile application' OR 'mobile apps'/exp OR 'mobile apps' OR 'gadgets' OR 'mobile phone'/exp OR 'mobile phone' OR 'health tracker' OR 'mhealth'/exp OR mhealth OR 'wearable device'/exp OR 'wearable device' OR 'fitbit' OR 'iphone'/exp OR 'iphone' OR 'android'/exp OR android OR 'cell phones' OR 'cellular phones' OR 'smartphones' OR 'commecial accelerometer' OR ' commercial actigraphy' OR 'wrist-based' OR 'handheld device' AND ('sleep disordered breathing'/exp OR 'sleep disordered breathing' OR 'snoring'/exp OR snoring) AND [2007-2017/py

### Grey Literature: Google

("sleep apnea" OR snoring OR insomnia) AND ("mobile applications" OR "mobile apps" OR "cell phone" OR "mobile phone"); site:.org, site:.edu, site:.gov +.pdf

**Table S2.A.** Threshold of Index Interventions for OSA\* Diagnostics Studies using Laboratory PSG<sup>o</sup> as the Standard Comparison

| Study                                                              | Threshold (AHI <sup>o</sup> ) | OSA* (n) | Non-OSA* (n) | Prevalence (%) | True Positive | False Positive | False Negative | True Negative |
|--------------------------------------------------------------------|-------------------------------|----------|--------------|----------------|---------------|----------------|----------------|---------------|
| <b>Studies with Bed/Mattress based-sensors</b>                     |                               |          |              |                |               |                |                |               |
| Agatsuma (2009)                                                    | ≥5                            | 162      | 39           | 80.60          | 162           | 26             | 0              | 13            |
|                                                                    | ≥15                           | 127      | 74           | 63.20          | 123           | 30             | 4              | 44            |
|                                                                    | ≥30                           | 89       | 112          | 44.30          | 72            | 22             | 17             | 90            |
| Beattie (2013)                                                     | ≥5                            | 31       | 14           | 68.90          | 26            | 3              | 5              | 11            |
|                                                                    | ≥15                           | 15       | 30           | 33.30          | 13            | 1              | 2              | 29            |
|                                                                    | ≥30                           | 12       | 33           | 26.70          | 12            | 1              | 0              | 30            |
| Norman (2014)                                                      | ≥5                            | 47       | 13           | 80.00          | 44            | 3              | 3              | 10            |
|                                                                    | ≥15                           | 25       | 35           | 41.67          | 22            | 3              | 3              | 32            |
|                                                                    | ≥30                           | 10       | 50           | 16.67          | 10            | 2              | 0              | 48            |
| Takasaki (2008)                                                    | ≥5                            | 45       | 7            | 86.50          | 45            | 7              | 0              | 0             |
|                                                                    | ≥10                           | 40       | 12           | 76.90          | 40            | 7              | 0              | 5             |
|                                                                    | ≥15                           | 33       | 19           | 63.50          | 33            | 7              | 0              | 12            |
|                                                                    | ≥20                           | 31       | 21           | 59.60          | 29            | 5              | 2              | 16            |
|                                                                    | ≥30                           | 27       | 25           | 51.90          | 24            | 2              | 3              | 23            |
|                                                                    | ≥40                           | 24       | 28           | 46.20          | 18            | 0              | 6              | 28            |
| Tenhunem (2013)                                                    | ≥5                            | 110      | 47           | 70.10          | 36            | 21             | 11             | 89            |
|                                                                    | ≥15                           | 61       | 96           | 38.85          | 91            | 5              | 5              | 56            |
|                                                                    | ≥30                           | 34       | 123          | 21.66          | 115           | 6              | 8              | 28            |
| Tsukahara (2014)                                                   | ≥5                            | -        | -            | -              | -             | -              | -              | -             |
|                                                                    | ≥20                           | -        | -            | -              | -             | -              | -              | -             |
| <b>Contactless Devices (Other than Bed/Mattress based sensors)</b> |                               |          |              |                |               |                |                |               |
| Abad Capa (2016)                                                   | ≥5                            | 44       | 6            | 88.00          | 44            | 1              | 0              | 5             |
|                                                                    | ≥15                           | 34       | 16           | 68.00          | 30            | 3              | 4              | 13            |
|                                                                    | ≥30                           | 23       | 27           | 46.00          | 19            | 1              | 4              | 26            |
| Davidovich (2016)                                                  | ≥15                           | 34       | 62           | 35.40          | 30            | 7              | 4              | 55            |
| Espinoza-Cuadros (2015)                                            | ≥5                            | 239      | 46           | 83.90          | 238           | 44             | 1              | 2             |
|                                                                    | ≥10                           | 203      | 82           | 71.20          | 175           | 64             | 18             | 28            |
|                                                                    | ≥15                           | 154      | 131          | 54.00          | 98            | 43             | 56             | 88            |
|                                                                    | ≥30                           | 23       | 262          | 8.10           | 17            | 12             | 6              | 196           |
| Nandakumar (2015)                                                  | ≥5                            | 26       | 11           | 70.30          | 22            | 1              | 4              | 10            |
|                                                                    | ≥15                           | 15       | 22           | 40.50          | 15            | 0              | 0              | 22            |
|                                                                    | ≥30                           | 7        | 30           | 18.90          | 7             | 0              | 0              | 30            |
| Zaffaroni (2013)                                                   | ≥5                            | 57       | 17           | 77.00          | 56            | 9              | 1              | 8             |
|                                                                    | ≥15                           | 38       | 36           | 51.40          | 34            | 3              | 4              | 33            |
|                                                                    | ≥30                           | 19       | 55           | 25.68          | 16            | 6              | 3              | 49            |
| Weinreich (2014)                                                   | ≥5                            | 41       | 11           | 78.85          | 41            | 5              | 0              | 5             |
|                                                                    | ≥10                           | 36       | 16           | 69.23          | 33            | 4              | 3              | 12            |
|                                                                    | ≥15                           | 28       | 24           | 53.85          | 27            | 3              | 1              | 21            |
| <b>Contact Devices with at least three sensors</b>                 |                               |          |              |                |               |                |                |               |
| Al-Mardini M 2014                                                  | ≥5                            | 8        | 7            | 53.30          | 8             | 1              | 0              | 6             |
|                                                                    | ≥15                           | 6        | 9            | 40.00          | 6             | 0              | 0              | 9             |
|                                                                    | ≥30                           | 4        | 11           | 26.70          | 3             | 0              | 1              | 11            |
| Benistant (2016)                                                   | ≥5                            | 4        | 5            | 44.40          | 2             | 0              | 2              | 5             |
|                                                                    | ≥15                           | 0        | 9            | 0.00           | 0             | 0              | 0              | 9             |
|                                                                    | ≥30                           | 0        | 9            | 0.00           | 0             | 0              | 0              | 9             |
| Rofouei (2011)                                                     | ≥5                            | 1        | 0            | -              | -             | -              | -              | -             |

| <b>Contact Devices with less than 3 sensors</b> |           |    |    |       |    |   |    |    |
|-------------------------------------------------|-----------|----|----|-------|----|---|----|----|
| Dinç (2014)                                     | $\geq 5$  | 26 | 5  | 83.90 | 14 | 0 | 12 | 5  |
|                                                 | $\geq 15$ | 16 | 15 | 51.60 | 7  | 0 | 9  | 15 |
|                                                 | $\geq 30$ | 9  | 22 | 29.00 | 4  | 0 | 5  | 22 |
| Levendowski (2015) Study A                      | $\geq 5$  | 14 | 6  | 70.00 | 11 | 0 | 3  | 6  |
|                                                 | $\geq 15$ | 13 | 7  | 65.00 | 11 | 1 | 2  | 6  |
|                                                 | $\geq 30$ | 12 | 8  | 60.00 | 10 | 1 | 2  | 7  |
| Ozmen (2011)                                    | $\geq 15$ | 30 | 34 | 46.88 | 25 | 8 | 5  | 26 |
|                                                 | $\geq 25$ | 25 | 39 | 39.06 | 20 | 8 | 5  | 31 |
|                                                 | $\geq 40$ | 18 | 46 | 28.13 | 17 | 3 | 1  | 43 |
| Selvaraj (2014) <sup>§</sup>                    | $\geq 15$ | 15 | 38 | 28.30 | 11 | 4 | 4  | 34 |
| Nakano (2014)                                   | $\geq 15$ | 23 | 17 | 57.50 | -  | - | -  | -  |
|                                                 | $\geq 30$ | -  | -  | -     | -  | - | -  | -  |

\*OSA: Obstructive sleep apnea

<sup>o</sup>PSG: Polysomnogram

<sup>o</sup>AHI: Apnea hypopnea index

<sup>§</sup> The study participants were tested with the sensors positioned in three different locations of their chest. The prevalence, sensitivity and specificity results of the three different location results were averaged.

**Table S2.A.** Shows the total number of participants diagnosed with OSA with the standard laboratory diagnosis PSG, and the number of true positives, true negatives, false positives and false negatives of the index test for each AHI threshold evaluated in the included studies

**Table S2.B.** Threshold of Index Interventions for OSA\* Diagnostics Studies with Home PSG<sup>‡</sup> as Standard Comparison

| Study                                               | Threshold (AHI <sup>§</sup> ) | OSA* (n) | Non-OSA* (n) | Prevalence (%) | True Positive | False Positive | False Negative | True Negative |
|-----------------------------------------------------|-------------------------------|----------|--------------|----------------|---------------|----------------|----------------|---------------|
| <i>Contactless Devices with less than 3 sensors</i> |                               |          |              |                |               |                |                |               |
| Levendowski (2015) - B                              | >=5                           | 16       | 8            | 66.70%         | 11            | 2              | 5              | 6             |
|                                                     | >=10                          | 11       | 13           | 45.83%         | 10            | 3              | 1              | 10            |
|                                                     | >=15                          | 9        | 15           | 37.50%         | 9             | 4              | 0              | 11            |

\*OSA: Obstructive sleep apnea

‡PSG: Polysomnogram

§AHI: Apnea hypopnea index

**Table S2.B.** Shows the total number of participants diagnosed with OSA with the standard home-based diagnostic PSG, and the number of true positives, true negatives, false positives and false negatives of the index test for each AHI threshold evaluated in the included study

**Table S2.C.** Threshold of Index Interventions for Snoring Diagnosis

| Study               | Threshold (AHI <sup>®</sup> )  | OSA* (n) | Non-OSA* (n) | Prevalence (%)          | True Positive | False Positive | False Negative | True Negative |
|---------------------|--------------------------------|----------|--------------|-------------------------|---------------|----------------|----------------|---------------|
| Kreivi (2013)       | 5% of total sleep time snoring | 148      | 52           | 74%                     | 136           | 21             | 12             | 31            |
| Camacho (patient 1) | 53dB                           | 1        | 0            | Number of snorers: 380  | 363           | 15             | 17             | -             |
| Camacho (patient 2) | 53dB                           | 1        | 0            | Number of snorers: 1158 | 737           | 53             | 421            | -             |

<sup>®</sup>AHI: *Apnea hypopnea index*

**Table S2.C.** Shows the total number of participants diagnosed as snorers with the standard diagnostic PSG, and the number of true positives, true negatives, false positives and false negatives of the index test for each threshold used in the included studies

**Table S3.** Characteristics of the excluded studies

| <b>Study</b>                       | <b>Reason for Excluding Study</b>                                                       |
|------------------------------------|-----------------------------------------------------------------------------------------|
| <b>Abdelnasser (2015)</b>          | Measuring apnea in normal individuals simulating apneas. No comparison to gold standard |
| <b>Abeyratne (2015)</b>            | Used pre-existing polysomnogram sensor in isolation. No wearable/device                 |
| <b>Baharav (2013)</b>              | No comparison to gold standard                                                          |
| <b>Barak-Shinar (2013)</b>         | Used pre-existing polysomnogram sensor in isolation. No wearable/device                 |
| <b>Ben-Israel (2012)</b>           | Used pre-existing polysomnogram sensor in isolation. No wearable/device                 |
| <b>Bhat et al (2015)</b>           | Does not measure AHI or RDI. Compare sleep time only.                                   |
| <b>Blackwell et al (2011)</b>      | Does not measure AHI or RDI. Compare sleep time only.                                   |
| <b>Bsoul et al (2011)</b>          | Used pre-existing polysomnogram sensor in isolation. No wearable/device                 |
| <b>Cao et al (2012)</b>            | Measuring apnea in normal individuals simulating apneas. No comparison to gold standard |
| <b>Chen et al (2013)</b>           | No comparison to gold standard                                                          |
| <b>De Silva et al (2011)</b>       | No use of device                                                                        |
| <b>Durán-Cantolla et al (2017)</b> | Use of class III medical device as index test                                           |
| <b>Emoto et al (2014)</b>          | Used pre-existing polysomnogram sensor in isolation. No wearable/device                 |
| <b>Fischer et al (2016)</b>        | No comparison to gold standard                                                          |
| <b>Fiz et al (2010)</b>            | Used pre-existing polysomnogram sensor in isolation. No wearable/device                 |
| <b>Hassan et al (2016)</b>         | Used pre-existing polysomnogram sensor in isolation. No wearable/device                 |
| <b>Iovanovici et al (2015)</b>     | Use of class II medical device as index test                                            |
| <b>Kagawa et al (2013)</b>         | Did not measure sensitivity and specificity of OSA diagnosis                            |
| <b>Kim et al (2016)</b>            | Used pre-existing polysomnogram sensor in isolation. No wearable/device                 |
| <b>Lee et al (2013)</b>            | Used pre-existing polysomnogram sensor in isolation. No wearable/device                 |
| <b>Liu et al (2016)</b>            | Measuring apnea in normal individuals simulating apneas                                 |
| <b>Michael et al (2007)</b>        | Used pre-existing polysomnogram sensor in isolation. No wearable/device                 |
| <b>Mlynczak et al (2016)</b>       | No comparison to gold standard                                                          |
| <b>Nasu et al (2011)</b>           | No comparison to gold standard                                                          |
| <b>Ng et al (2009)</b>             | Used pre-existing polysomnogram sensor in isolation. No wearable/device                 |
| <b>O'Hare et al (2015)</b>         | Only measured sleep efficiency and total sleep time                                     |
| <b>Oliver et al (2007)</b>         | No comparison to gold standard                                                          |
| <b>Pan et al (2016)</b>            | Use of class II medical device as index test                                            |
| <b>Ren et al (2015)</b>            | No comparison to gold standard                                                          |
| <b>Romen et al (2014)</b>          | Use of class II medical device as index test                                            |
| <b>Seren et al (2014)</b>          | No comparison to gold standard                                                          |
| <b>Shin et al (2014)</b>           | No comparison to gold standard                                                          |
| <b>Tseng (2012)</b>                | Used pre-existing polysomnogram data                                                    |
| <b>Weinmin et al (2013)</b>        | Tested index is a FDA approved medical device                                           |
| <b>Xu et al (2015)</b>             | Used pre-existing polysomnogram sensor in isolation. No wearable/device                 |

**Table S3** Shows the reason for excluding the 35 studies for which the full-texts were obtained

**Table S4.** QUADAS-2 Summary Description

| Study                  | Domain 1. Patient Selection                              |                                    |                                               |               |                                                                                                                                                                           | Domain 2. Index Test |                                                                                                     |                                                |               |                                                                                                         | Domain 3. Standard test |                                                                              |                                                                                                         |        | Domain 4. Flow and Timing                                                                                      |        |                                                                        |                                                       |                                             |        |
|------------------------|----------------------------------------------------------|------------------------------------|-----------------------------------------------|---------------|---------------------------------------------------------------------------------------------------------------------------------------------------------------------------|----------------------|-----------------------------------------------------------------------------------------------------|------------------------------------------------|---------------|---------------------------------------------------------------------------------------------------------|-------------------------|------------------------------------------------------------------------------|---------------------------------------------------------------------------------------------------------|--------|----------------------------------------------------------------------------------------------------------------|--------|------------------------------------------------------------------------|-------------------------------------------------------|---------------------------------------------|--------|
|                        | Risk of Bias                                             |                                    |                                               | Applicability |                                                                                                                                                                           | Risk of bias         |                                                                                                     |                                                | Applicability |                                                                                                         | Risk of Bias            |                                                                              | Applicability                                                                                           |        | Risk of Bias                                                                                                   |        |                                                                        |                                                       |                                             |        |
|                        | Was a consecutive or random sample of patients enrolled? | Was a case-control design avoided? | Did the study avoid inappropriate exclusions? | Result        | Are there concerns that the included patients and setting do not match the review question? (accuracy of non-PSG test for snoring/OSA diagnosis for adults with symptoms) | Result               | Were the index test results interpreted without knowledge of the results of the reference standard? | If a threshold was used, was it pre-specified? | Result        | Are there concerns that the index test, its conduct, or interpretation differ from the review question? | Result                  | Is the reference standard likely to correctly classify the target condition? | Were the reference standard results interpreted without the knowledge of the results of the index test? | Result | Are there concerns that the target condition as defined by the reference standard does not match the question? | Result | Was there an appropriate interval between test and reference standard? | Did all patients receive the same reference standard? | Were all patients included in the analysis? | Result |
| Al-Mardini (2013;2014) | U                                                        | No                                 | U                                             | U             | Yes                                                                                                                                                                       | High                 | Yes                                                                                                 | Yes                                            | Low           | No                                                                                                      | Low                     | U                                                                            | U                                                                                                       | U      | No                                                                                                             | Low    | No                                                                     | U                                                     | Yes                                         | High   |
| Benistant (2016)       | Yes                                                      | Yes                                | Yes                                           | Low           | No                                                                                                                                                                        | Low                  | Yes                                                                                                 | Yes                                            | Low           | No                                                                                                      | Low                     | Yes                                                                          | Yes                                                                                                     | Low    | No                                                                                                             | Low    | Yes                                                                    | Yes                                                   | No                                          | Low    |
| Norman (2014)          | U                                                        | No                                 | Yes                                           | High          | Yes                                                                                                                                                                       | High                 | Yes                                                                                                 | Yes                                            | Low           | No                                                                                                      | Low                     | Yes                                                                          | Yes                                                                                                     | Low    | No                                                                                                             | Low    | Yes                                                                    | No                                                    | No                                          | High   |
| Tsukahara (2014)       | Yes                                                      | Yes                                | Yes                                           | low           | No                                                                                                                                                                        | low                  | Yes                                                                                                 | U                                              | U             | No                                                                                                      | low                     | Yes                                                                          | Yes                                                                                                     | low    | No                                                                                                             | Low    | Yes                                                                    | Yes                                                   | Yes                                         | low    |
| Beattie (2013)         | U                                                        | Yes                                | Yes                                           | U             | No                                                                                                                                                                        | low                  | Yes                                                                                                 | Yes                                            | low           | No                                                                                                      | low                     | Yes                                                                          | Yes                                                                                                     | low    | No                                                                                                             | low    | Yes                                                                    | Yes                                                   | U                                           | low    |
| Agatsuma (2009)        | Yes                                                      | Yes                                | Yes                                           | low           | Yes                                                                                                                                                                       | U                    | Yes                                                                                                 | Yes                                            | low           | No                                                                                                      | low                     | Yes                                                                          | Yes                                                                                                     | low    | No                                                                                                             | low    | Yes                                                                    | Yes                                                   | No                                          | low    |
| Rofouei (2011)         | U                                                        | Yes                                | U                                             | High          | Yes                                                                                                                                                                       | high                 | U                                                                                                   | Yes                                            | high          | No                                                                                                      | low                     | Yes                                                                          | U                                                                                                       | high   | No                                                                                                             | low    | No                                                                     | Yes                                                   | Yes                                         | high   |
| Takasaki (2008)        | Yes                                                      | Yes                                | Yes                                           | low           | No                                                                                                                                                                        | low                  | Yes                                                                                                 | Yes                                            | low           | No                                                                                                      | low                     | Yes                                                                          | Yes                                                                                                     | low    | No                                                                                                             | low    | Yes                                                                    | Yes                                                   | Yes                                         | low    |
| Tenhunem (2013)        | Yes                                                      | Yes                                | Yes                                           | low           | U                                                                                                                                                                         | U                    | U                                                                                                   | No                                             | high          | no                                                                                                      | low                     | Yes                                                                          | U                                                                                                       | U      | No                                                                                                             | low    | Yes                                                                    | Yes                                                   | No                                          | high   |
| Nandakumar (2015)      | Yes                                                      | Yes                                | Yes                                           | low           | U                                                                                                                                                                         | U                    | Yes                                                                                                 | Yes                                            | low           | No                                                                                                      | low                     | Yes                                                                          | Yes                                                                                                     | low    | No                                                                                                             | low    | Yes                                                                    | Yes                                                   | Yes                                         | low    |
| Weinreich (2014)       | Yes                                                      | Yes                                | Yes                                           | low           | No                                                                                                                                                                        | low                  | U                                                                                                   | Yes                                            | U             | No                                                                                                      | low                     | Yes                                                                          | U                                                                                                       | U      | No                                                                                                             | low    | Yes                                                                    | Yes                                                   | Yes                                         | low    |
| Zaffaroni (2013)       | Yes                                                      | Yes                                | Yes                                           | low           | No                                                                                                                                                                        | low                  | U                                                                                                   | Yes                                            | low           | No                                                                                                      | low                     | Yes                                                                          | U                                                                                                       | U      | No                                                                                                             | low    | Yes                                                                    | Yes                                                   | Yes                                         | low    |
| Davidovich (2016)      | Yes                                                      | Yes                                | Yes                                           | low           | No                                                                                                                                                                        | low                  | U                                                                                                   | Yes                                            | low           | No                                                                                                      | low                     | Yes                                                                          | Yes                                                                                                     | low    | No                                                                                                             | low    | Yes                                                                    | Yes                                                   | Yes                                         | low    |

|                                |     |     |     |      |     |     |     |     |      |     |      |      |     |     |     |      |     |     |     |      |
|--------------------------------|-----|-----|-----|------|-----|-----|-----|-----|------|-----|------|------|-----|-----|-----|------|-----|-----|-----|------|
| <b>Levendowski (2015)</b>      | Yes | Yes | Yes | low  | U   | U   | U   | Yes | U    | No  | low  | Yes. | U   | U   | U   | U    | Yes | Yes | No  | low  |
| <b>Abad Capa (2016)</b>        | Yes | Yes | No  | U    | No  | low | Yes | No  | high | No  | low  | Yes  | Yes | low | No  | low  | Yes | Yes | No  | U    |
| <b>Espinoza-Cuadros (2015)</b> | Yes | yes | Yes | low  | No  | low | Yes | Yes | low  | Yes | high | Yes  | Yes | low | Yes | high | U   | Yes | Yes | U    |
| <b>Selvaraj (2014)</b>         | U   | No  | U   | high | U   | U   | U   | U   | U    | No  | low  | Yes  | U   | U   | No  | low  | Yes | Yes | Yes | low  |
| <b>Nakano (2014)</b>           | U   | U   | U   | high | Yes | U   | U   | Yes | low  | No  | low  | yes  | U   | U   | No  | low  | Yes | Yes | No  | low  |
| <b>Dinç, A.E. (2014)</b>       | Yes | Yes | U   | low  | No  | low | Yes | yes | low  | no  | low  | Yes  | Yes | low | No  | low  | No  | Yes | No  | high |
| <b>Ozmen (2011)</b>            | Yes | Yes | Yes | low  | No  | low | Yes | Yes | Low  | Yes | high | Yes  | Yes | Low | No  | Low  | No  | Yes | No  | high |
| <b>Camacho (2015)</b>          | U   | U   | U   | U    | no  | low | U   | No  | high | no  | low  | Yes  | U   | U   | No  | low  | Yes | Yes | Yes | low  |
| <b>Kreivi (2013)</b>           | Yes | Yes | Yes | low  | No  | low | U   | Yes | U    | No  | low  | Yes  | U   | U   | No  | low  | Yes | Yes | Yes | low  |
